# Supplementary material for: FieldML, a proposed open standard for the Physiome project for mathematical model representation
Source: PubMed Central journal article supplement (PMC3825639; doi:10.1007/s11517-013-1097-7), 2013-07-31
Supplement: 11517_2013_1097_MOESM3_ESM.pdf [file 11517_2013_1097_MOESM3_ESM.pdf]

Table 4 Equation style summary of line-by-line description of FieldML example XML

| Line number | Object                     | Name                                               | Equation                                               | Description                                                                                                |
|-------------|----------------------------|----------------------------------------------------|--------------------------------------------------------|------------------------------------------------------------------------------------------------------------|
| 13          | Import: Ensemble Type      | <code>trilinearLagrange.points</code>              | $LL3c = \{1,2, \dots, 8\}$                             | Set of identifiers, essentially for the 8 corners of the unit cube                                         |
| 12          | Import: Continuous Type    | <code>trilinearLagrange.parameters</code>          | $LL3p = \mathbb{R}^8$                                  | 8 real numbered nodal DOF values for the 8 corners of the unit cube for tri-linear Lagrange interpolation. |
|             |                            |                                                    | $LL3p = (LL3c \rightarrow \mathbb{R})$                 | Alternate view of the above.                                                                               |
| 16          | Import: Argument Evaluator | <code>trilinearLagrange.parameters.argument</code> |                                                        |                                                                                                            |
| 19          | Import: Argument Evaluator | <code>chart.3d.argument</code>                     | $\xi \in \mathbb{R}^3$                                 | Unit cube                                                                                                  |
| 18          | Import: External Evaluator | <code>trilinearLagrange.interpolator</code>        | $LL3: \mathbb{R}^3 \times LL3p \rightarrow \mathbb{R}$ | tri-linear Lagrange interpolation basis functions                                                          |
| 21          | Import: External Evaluator | <code>shape.unit.cube</code>                       | $pU3: \mathbb{R}^3 \rightarrow \mathbb{B}$             | Shape predicate                                                                                            |

|         |                      |                                                   |                                                     |                                                                                                                              |
|---------|----------------------|---------------------------------------------------|-----------------------------------------------------|------------------------------------------------------------------------------------------------------------------------------|
| 25      | Ensemble type        | <code>mesh1.nodes</code>                          | $m1n = \{1,2, \dots, 20\}$                          |                                                                                                                              |
| 34      | Argument Evaluator   | <code>mesh1.nodes.argument</code>                 | $m1na \in m1n$                                      |                                                                                                                              |
| 38      | Argument Evaluator   | <code>mesh1.node.dofs.argument</code>             | $m1dof: m1n \rightarrow \mathbb{R}$                 |                                                                                                                              |
| 46      | Mesh type's ensemble | <code>mesh1.mesh.type.elements</code>             | $m1e = \{1, 2, \dots, 4\}$                          | Four elements in mesh                                                                                                        |
| 45      | Mesh Type            | <code>mesh1.mesh.type</code>                      | $m1 = m1e \times U3$                                | Four unit squares                                                                                                            |
| 54      | Predicate            |                                                   | $U3 = [0,1] \times [0,1] \times [0,1]$              | Unit square                                                                                                                  |
| 83      | Parameter Evaluator  | <code>mesh1.trilinearLagrange.connectivity</code> | $m1c: m1e \rightarrow LL3c \rightarrow m1n$         | Local node to global node mapping. This is a matrix.                                                                         |
| 94      | Aggregate Evaluator  | <code>mesh1.trilinearLagrange.parameters</code>   | $a1: m1e \rightarrow LL3p$                          | Forms parameter vector of the 8 parameters required for tri-linear Lagrange interpolation of a scalar field for each element |
|         |                      |                                                   | $a1: m1e \rightarrow (LL3c \rightarrow \mathbb{R})$ | Alternative view of the above                                                                                                |
|         |                      |                                                   | $a1: m1e \rightarrow LL3c \rightarrow \mathbb{R}$   | Alternative view of the above, using currying style.                                                                         |
| 98, 100 |                      |                                                   | $a1(e, n) = m1dof(m1c(e, n))$                       | Behaviour of the above: get global node from local to global node mapping,                                                   |

|     |                     |                                           |                                                                                                                                                        |                                                                                               |
|-----|---------------------|-------------------------------------------|--------------------------------------------------------------------------------------------------------------------------------------------------------|-----------------------------------------------------------------------------------------------|
|     |                     |                                           |                                                                                                                                                        | get DOF from nodal parameters for field.                                                      |
| 106 | Reference Evaluator | <code>mesh1.trilinear.interpolator</code> | $r1: m1 \rightarrow \mathbb{R}$<br>$r1(e, \xi) = LL3(\xi, (n \mapsto a1(e, n)))$                                                                       | The definition of $r1$ implies that $\xi \in U3$ , $e \in m1e$ and $a1(e) \in \mathbb{R}^8$ . |
| 120 | Piecewise Evaluator | <code>mesh1.template.trilinear</code>     | $m1pw: m1e \rightarrow (U3 \times LL3p \rightarrow \mathbb{R})$<br>$\forall e \in m1e, m1pw(e) = LL3$                                                  |                                                                                               |
| 222 | Parameter Evaluator | <code>mesh1.node.pressure</code>          | $pn: m1n \rightarrow \mathbb{R}$                                                                                                                       | Pressure nodal DOFs                                                                           |
| 232 | Reference Evaluator | <code>pressure</code>                     | $pr: (m1n \rightarrow \mathbb{R}) \rightarrow (m1 \rightarrow \mathbb{R})$<br>$pr: (m1n \rightarrow \mathbb{R}) \rightarrow m1 \rightarrow \mathbb{R}$ | Pressure field declaration, equivalent forms.                                                 |
|     |                     |                                           | $pr(pn, (e, \xi)) = s(\xi, l)$<br>where<br>$s = m1pw(e) = LL3$<br>$l = (n \mapsto pn(m1c(e, n)))$<br>$l \in LL3p$                                      | Pressure field definition                                                                     |
| 165 | Parameter Evaluator | <code>mesh1.node.coordinates</code>       | $cn: m1n \rightarrow \{1,2,3\} \rightarrow \mathbb{R}$                                                                                                 | 3D geometric coordinates DOFs. This is a matrix.                                              |

|     |                     |             |                                                                                                                                                                                                                                                                              |                                                  |
|-----|---------------------|-------------|------------------------------------------------------------------------------------------------------------------------------------------------------------------------------------------------------------------------------------------------------------------------------|--------------------------------------------------|
| 179 | Aggregate Evaluator | coordinates | $gc: (m1n \rightarrow \mathbb{R}) \rightarrow (m1 \rightarrow \mathbb{R}^3)$ $gc: (m1n \rightarrow \mathbb{R}) \rightarrow m1 \rightarrow (\{1,2,3\} \rightarrow \mathbb{R})$ $gc: (m1n \rightarrow \mathbb{R}) \rightarrow m1 \rightarrow \{1,2,3\} \rightarrow \mathbb{R}$ | Coordinates field declaration, equivalent forms. |
|     |                     |             | $\forall d \in \{1,2,3\},$ $gc(cn, (e, \xi), d) = s(\xi, l)$ <p>where</p> $s = m1pw(e) = LL3$ $l = (n \mapsto cn(m1c(e, n), d))$ $l \in LL3p$                                                                                                                                | Coordinate field definition                      |
